# Supplementary material for: A novel cyclometalated Ir(iii) complex based luminescence intensity and lifetime sensor for Cu2+
Source: Royal Society of Chemistry journal article supplement (doi:10.1039/c5ra27189d), 2016-01-01
Supplement: c5ra27189d1.pdf [file c5ra27189d1.pdf]

A novel cyclometalated Ir(III) complex based luminescence intensity and lifetime sensor for Cu<sup>2+</sup>

Wei Shen, Zhengjian Qi\*, Liqiang Yan, Wenwen Tian, Xia Cui, Hongtao Yao, Yueming Sun\*

*College of Chemistry and Chemical Engineering, Southeast University, Nanjing, Jiangsu 211189, P.R. China*

\* E-mail: qizhengjian@seu.edu.cn (ZJ Qi), sun@seu.edu.cn (YM. Sun)

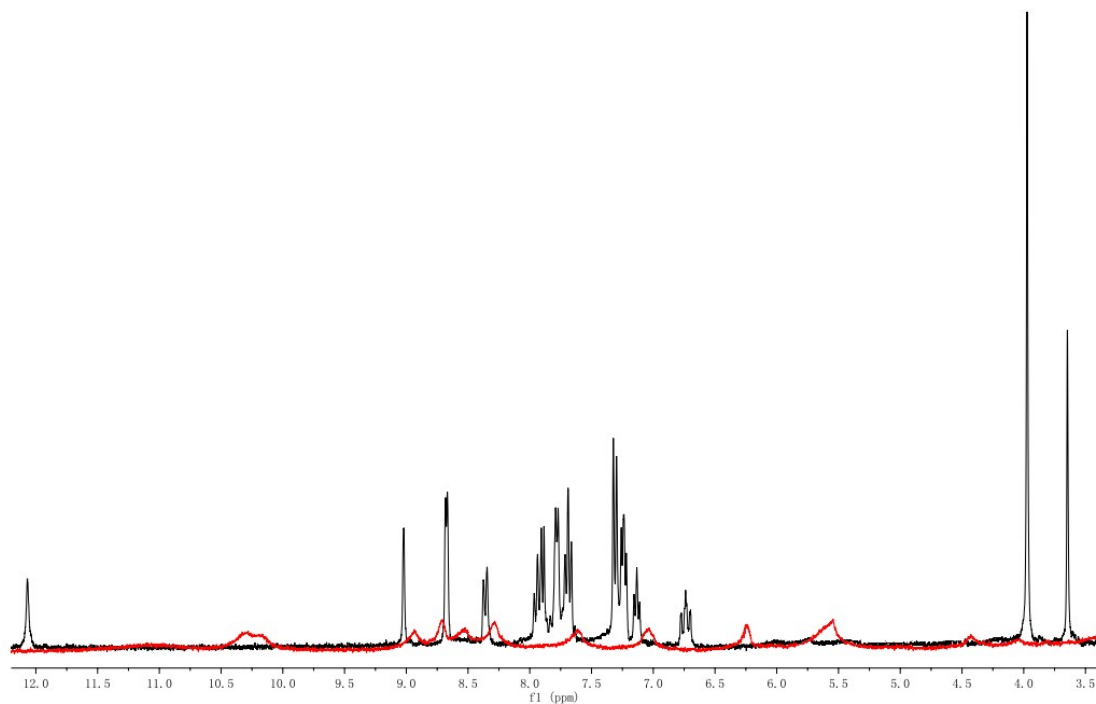

**Fig. S1.** The comparative trial of <sup>1</sup>H NMR spectra of **Ir-2** (black line) and **Ir-2** + 4.0 equiv. Cu<sup>2+</sup> (red line) in MeCN-*d*<sub>3</sub> solution.

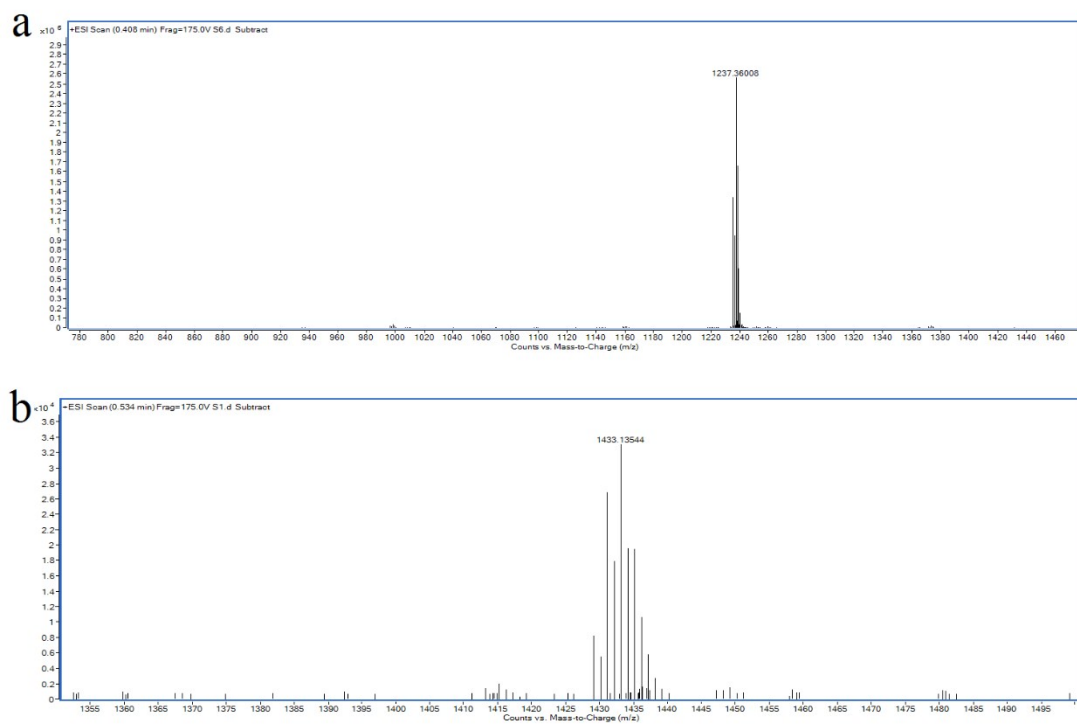

**Fig. S2.** The comparative trial of ESI<sup>+</sup>–HRMS spectra of **Ir-2**(a) and **Ir-2** + 4.0 equiv. Cu<sup>2+</sup> (b).

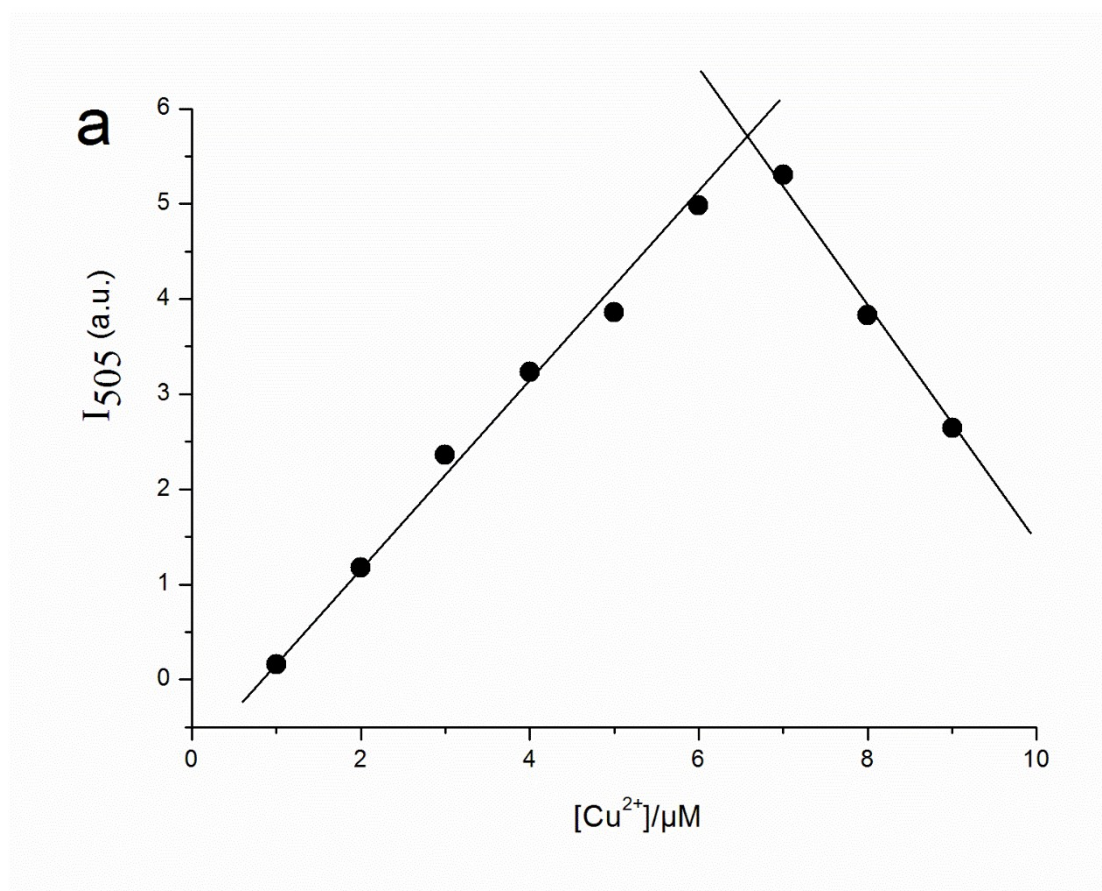

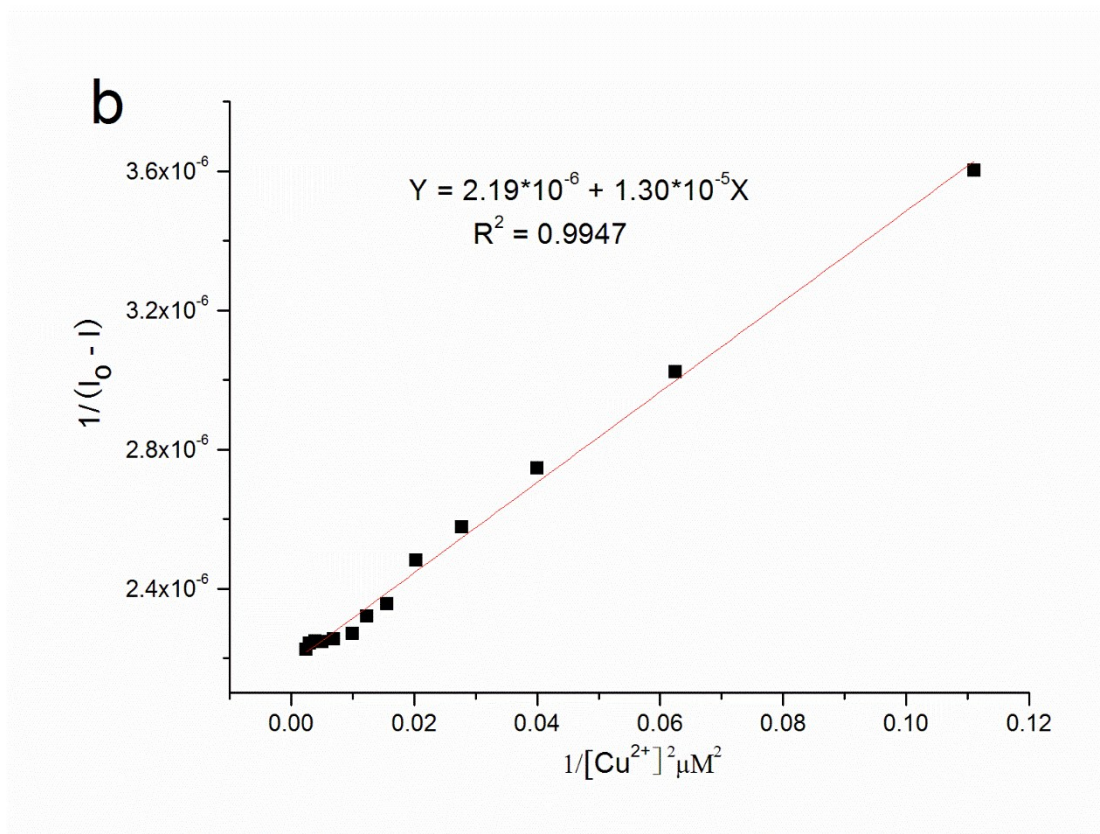

**Fig. S3.** (a) Job's plot of **Ir-2** with  $Cu^{2+}$  according to the method of continuous variations. The total concentrations of **Ir-2** and  $Cu^{2+}$  were kept constant at  $10 \mu M$ . The PL intensity was recorded in a aqueous solution. (b) Benesi-Hildebrand linear analysis plot of **Ir-2** at different  $Cu^{2+}$  concentrations.
